# Supplementary material for: Switch-on luminescence detection of steroids by tris(bipyridyl)ruthenium(ii) complexes containing multiple cyclodextrin binding sites
Source: Royal Society of Chemistry journal article supplement (doi:10.1039/b000271m), 2000-01-01
Supplement: b000271m.doc [file b000271m.doc]

Dimer **4** was synthesised in a similar way as **3**5 from 4,4’-dicarboxy-2,2’-bipyridine and a monofunctionalised heptakis-6-O-(*tert*-butyldimethylsilyl)--cyclodextrin derivative, bearing a 3-aminopropyl functionality on one of its C2-OH groups.1d The silylated dimer was deprotected with tetrabutylammonium fluoride in THF to give the water soluble compound **4**. (yield: 32% over 3 steps) 1H NMR (300 MHz, D2O/DMSO-d6, 1:1 v/v)  8.98 (d, 2H, *J*AB=6.0 Hz), 8.70 (s, 2H), 7.92 (d, 2H, *J*AB=6.0 Hz), 5.19 (br.s, 2H), 5.02 (br.s, 12H), 3.91-3.33 (m, 84H), 1.98 (br.s, 4H). The proton spectrum in pure D2O shows extra peaks due to self-inclusion of the spacer, similar to what is observed for other cyclodextrin dimers.5 This feature will be discussed in a full paper. FAB-MS: *m/z* 2592 [M+H]+. Anal. Calcd for C102H158N4O72.16H2O: C = 42.51; H = 6.65; N = 1.95. Found: C = 42.25; H = 6.19; N = 2.06.

Data for **2**: 1H NMR (300 MHz, DMSO-d6)  9.25 (br.s, 6H), 7.94 (br.s, 6H), 7.85 (br.s, 6H), 5.04 (br.s, 6H), 4.86 (br.s, 36H), 3.75-3.08 (m, 252H), 1.84 (br.s, 12H). The spectrum in pure D2O also shows extra peaks. Maldi-TOF MS: *m/z* 7950.6 [M]+ calc. 7949.1. Anal. Calcd for C306H474N12O216RuCl2.65H2O: C = 40.28; H = 6.68; N = 1.84. Found: C = 39.61; H = 6.01; N = 1.83.

**Figure 3** : Job-plot for the binding of *N,N’*-dinonyl-4,4’-bipyridinium bromide in **2** in an aequeous Tris-HCl buffer of pH 7.0. The total concentration of **2** and bipyridinium compound was kept constant during the titration by mixing stock solutions (110-5 M) of each compound in different ratios. I is the difference between the measured emission intensity and the intensity calculated for the solution of **2** having the same concentration but without bipyridinium ions.
